# Supplementary material for: Limited efficacy of APRIL CAR in patients with multiple myeloma indicate challenges in the use of natural ligands for CAR T-cell therapy
Source: PubMed Central journal article supplement (PMC10314698; doi:10.1136/jitc-2023-006699), 2023-06-30
Supplement: jitc-2023-006699supp002.pdf [file jitc-2023-006699supp002.pdf]

| Patient ID  | ISS stage at presentation | Cytogenetics markers    | Paraprotein or light chain type in serum | Presence of Extra-medullary disease | % Tumour by FACS (as a proportion of BM MNCs) | # of prior lines of therapy | Refractory to IMiD | Refractory to Proteasome Inhibitor | Refractory to IMiD and PI | Refractory to anti-CD38 | Prior lines of therapy - Best response                                                                                                                                                                |
|-------------|---------------------------|-------------------------|------------------------------------------|-------------------------------------|-----------------------------------------------|-----------------------------|--------------------|------------------------------------|---------------------------|-------------------------|-------------------------------------------------------------------------------------------------------------------------------------------------------------------------------------------------------|
| 0201GB01001 | III                       | 1q gain, t(11;14)       | IgG                                      | No                                  | 5                                             | 4                           | Yes                | Yes                                | Yes                       | No                      | 1) Dex/Thalidomide/Bortezomib - MR<br>2) Cisplatin/Cytarabine/Etoposide/Methylprednisolone - SD<br>3) Dex/Ixazomib - SD<br>4) Cisplatin/Cy/Dex/Etoposide/Thalidomide/Dox - SD                         |
| 0201GB01002 | I                         | t(11;14)                | IgG                                      | No                                  | 53                                            | 3                           | Yes                | Yes                                | Yes                       | No                      | 1) Dex/Bortezomib/Dex/Mephalan/Transplant - VGPR<br>2) Bortezomib/Dex/Thalidomide/Panobinostat - PD<br>3) Dex/Len/Ixazomib - PR                                                                       |
| 0201GB01003 | II                        | normal                  | IgG                                      | Yes                                 | 3.2                                           | 6                           | Yes                | Yes                                | Yes                       | No                      | 1) Cy/Dex/Thalidomide - UNK<br>2) Dex/Bortezomib - MR<br>3) Dex/Len - PD<br>4) Cy/Dex/Bortezomib - PR<br>5) Bendamustine/Dex/Thalidomide - PR<br>6) Clarithromycin/Dex/Len - SD                       |
| 0201GB01005 | I                         | UNK                     | IgG                                      | No                                  | 0                                             | 6                           | Yes                | Yes                                | Yes                       | No                      | 1) Cy/Dex/Vincristine - PR<br>2) Bortezomib/Dex/Dox - PD<br>3) Thalidomide - PR<br>4) Mephalan/transplant - UNK<br>5) Dex/Len - PR<br>6) Investigational drug (CC-220) - PD                           |
| 0201GB01006 | I                         | UNK                     | Light chain only                         | No                                  | 5                                             | 5                           | Yes                | Yes                                | Yes                       | No                      | 1) Cy/Dex/Thalidomide - PR<br>2) Dex/Bortezomib/Thalidomide - SD<br>3) Cisplatin/Cy/Dex/Dox/Etoposide/Thalidomide/Bortezomib - PR<br>4) Cy/Dex/Len - PR<br>5) Dex - SD                                |
| 0201GB05007 | UNK                       | UNK                     | IgG                                      | No                                  | 2                                             | 5                           | Yes                | No                                 | No                        | Yes                     | 1) Bortezomib/Dex - PR<br>2) Bortezomib/Dex - PR<br>3) Dex/Len - VGPR<br>4) Dex/Len - PR<br>5) Daratumumab - PD                                                                                       |
| 0201GB05008 | I                         | UNK                     | Light chain only                         | Yes                                 | 26                                            | 5                           | Yes                | Yes                                | Yes                       | No                      | 1) Cy/Dex/Thalidomide/Mephalan/Transplant - PR<br>2) Cy/Dex/Bortezomib/Mephalan/Transplant - PR<br>3) Cy/Dex/Len - SD<br>4) Dex/Pomalidomide - PD<br>5) Dex/Bortezomib/Panobinostat - PD              |
| 0201GB01009 | III                       | UNK                     | IgG                                      | Yes                                 | 0                                             | 6                           | Yes                | Yes                                | Yes                       | Yes                     | 1) Bortezomib/Dex/Mephalan/Transplant - CR<br>2) Dex/Len - UNK<br>3) Carfilzomib/Dex - UNK<br>4) Daratumumab - UNK<br>5) Dex/Ixazomib/Pomalidomide - UNK<br>6) Daratumumab/Dex/Bortezomib - UNK       |
| 0201NL01010 | I                         | 1q+, Hyperdiploidy      | IgG                                      | No                                  | 0                                             | 4                           | Yes                | Yes                                | Yes                       | Yes                     | 1) Bortezomib/Cy/Dex/Mephalan/Transplant - VGPR<br>2) Carfilzomib/Dex/Len - MR<br>3) Daratumumab/Tretinoin - SD<br>4) Cy/Dex/Pomalidomide - PR                                                        |
| 0201GB01011 | I                         | 1q+, Del17p13, t(11;14) | IgG                                      | No                                  | 5                                             | 6                           | Yes                | Yes                                | Yes                       | Yes                     | 1) Cy/Dex/Len - VGPR<br>2) Carfilzomib/Cy/Dex - CR<br>3) Dex/Thalidomide/Bortezomib - VGPR<br>4) Dex/Panobinostat/Bortezomib - SD<br>5) Dex/Ixazomib/Len - PD<br>6) Dex/Pomalidomide/Daratumumab - PR |
| 0201GB01012 | III                       | 1q+, Del17p13           | IgG                                      | No                                  | 11                                            | 4                           | Yes                | No                                 | No                        | Yes                     | 1) Cy/Dex/Bortezomib/Mephalan/Transplant - PR<br>2) Dex/Len - PR<br>3) Investigational drug (CC-220)/Dex - PR<br>4) Daratumumab - SD                                                                  |

**Supp Table 1.** AUTO2 patient details. Unknown (UNK), lenalidomide (len), dexamethasone (dex), Doxorubicin (Dox), Cyclophosphamide (cy), Stable Disease (SD), Minor Response (MR), Partial Response (PR), Very Good Partial Response (VGPR), Complete Response (CR), Autologous Stem Cell Transplant (Transplant)

\* Patient 005 had a history of pelvic radiotherapy thus bone marrow biopsies challenging

| Patient ID  | Bridging therapy and response                   | Dose received (10 <sup>6</sup> APRIL CAR T positive T cells) | Transduction efficiencies (%) | Best response according to IMWG (after 1st treatment) | Retreatment Bridging therapy and response | Retreatment dose received (10 <sup>6</sup> APRIL CAR T positive T cells) | Retreatment best response according to IMWG | Time of disease progression (from 1st treatment) | Survival Status (Study Day from 1st treatment) |
|-------------|-------------------------------------------------|--------------------------------------------------------------|-------------------------------|-------------------------------------------------------|-------------------------------------------|--------------------------------------------------------------------------|---------------------------------------------|--------------------------------------------------|------------------------------------------------|
| 0201GB01001 | No bridging                                     | 15                                                           | 32.4                          | SD                                                    | No bridging                               | 225                                                                      | SD                                          | Not applicable                                   | Alive (912)                                    |
| 0201GB01002 | No bridging                                     | 75                                                           | 5.81                          | SD                                                    | Not applicable                            | Not applicable                                                           | Not applicable                              | M3                                               | Alive (890)                                    |
| 0201GB01003 | No bridging                                     | 75                                                           | 12.74                         | SD                                                    | Not applicable                            | Not applicable                                                           | Not applicable                              | M2                                               | Dead (342)                                     |
| 0201GB01005 | No bridging                                     | 75                                                           | 8.9                           | PD                                                    | Daratumumab (SD)                          | 250                                                                      | PR                                          | M1                                               | Dead (425)                                     |
| 0201GB01006 | No bridging                                     | 225                                                          | 23                            | SD                                                    | Not applicable                            | Not applicable                                                           | Not applicable                              | M2                                               | Dead (269)                                     |
| 0201GB05007 | Dexamethasone/Pomalodomid (PD)                  | 200                                                          | 8.7                           | PR                                                    | Not applicable                            | Not applicable                                                           | Not applicable                              | Discontinued at M6 while still in PR             | Dead (373)                                     |
| 0201GB05008 | Daratumumab (PD)                                | 225                                                          | 32                            | SD                                                    | Not applicable                            | Not applicable                                                           | Not applicable                              | M2                                               | Dead (201)                                     |
| 0201GB01009 | No bridging                                     | 600                                                          | 17                            | VGPR                                                  | Not applicable                            | Not applicable                                                           | Not applicable                              | M8                                               | Dead (375)                                     |
| 0201NL01010 | Cyclophosphamide/Dexamethasone/Pomalodomid (SD) | 600                                                          | 40.2                          | PR                                                    | Not applicable                            | Not applicable                                                           | Not applicable                              | M4                                               | Dead (266)                                     |
| 0201GB01011 | No bridging                                     | 600                                                          | 41                            | MR                                                    | Not applicable                            | Not applicable                                                           | Not applicable                              | M2                                               | Dead (483)                                     |
| 0201GB01012 | No bridging                                     | 900                                                          | 24.2                          | SD                                                    | Not applicable                            | Not applicable                                                           | Not applicable                              | M3                                               | Alive (333)                                    |

**Supp Table 2.** AUTO2 bridging and disease response

| Patient   | Dose                | Timepoint    | FACS            |            |            | IHC            |                   |             |                                 |                       |
|-----------|---------------------|--------------|-----------------|------------|------------|----------------|-------------------|-------------|---------------------------------|-----------------------|
|           |                     |              | % CD138 /BMMNCs | BCMA (ABC) | TACI (ABC) | %CD138/ BMMNCs | % T cells/ BMMNCs | % CAR/ CD3+ | BCMA TACI (intensity, % of PCs) | (intensity, % of PCs) |
| AUTO2-001 | 15x10 <sup>6</sup>  | Baseline     | 5               | 548        | 1819       | 40-50          | 10                | 0           | Moderate/strong, 50%            | Weak/mod 40%          |
|           |                     | 1M           | 1               | 139        | 577        | 60-70          | 20                | 15          | Weak, 50%                       | Weak/mod, 30-40%      |
|           |                     | 3M           | 1.6             | 293        | 629        | 30             | 10                | 1           | Weak, 10%                       | Moderate, 40%         |
|           |                     | 6M           | 1.2             | 287        | 653        | 5              | 1-2%              | 0           | Weak, 10%                       | Weak, 30%             |
|           | 225x10 <sup>6</sup> | 2nd Baseline | 1.2             | 412        | 1147       | 0.4            | 0.01              | 0           | Weak, 20%                       | Weak/mod, >50%        |
|           |                     | 1M           | 0.18            | 214        | 569        | 0.8            | 0.05              | 1%          | Weak, >50%                      | Moderate, >50%        |
|           |                     | 6M           | 0.7             | 574        | 1824       | supoptimal     |                   |             |                                 |                       |
|           |                     | 12M          | not available   |            |            | 50%            | 5%                | <1%         | Moderate, >50%                  | Moderate, >50%        |
| AUTO2-002 | 75x10 <sup>6</sup>  | Baseline     | 52.9            | 640        | 381        | 70             | 1-2%              | 0           | Weak, 20                        | Moderate, 30-40%      |
|           |                     | 1M           | 22              | 771        | 563        | 60-70          | 10                | 1-2%        | Moderate, 30-40%                | Weak, 30-40%          |
|           |                     | 3M           | 43              | 403        | 173        | 80             | 5                 | 2-3%        | Moderate 40%                    | Moderate, 40%         |
| AUTO2-003 | 75x10 <sup>6</sup>  | Baseline     | 3.2             | 653        | 376        | 40-50          | 1-2%              | 0           | Weak, 50%                       | Weak, 10-20%          |
|           |                     | 1M           | 1.8             | 683        | 271        | 50-60%         | 10%               | 5%          | Weak 5%                         | Moderate 40%          |
| AUTO2-005 | 75x10 <sup>6</sup>  | Baseline     | 0               | N/A        | N/A        | suboptimal     | n/a               | n/a         | n/a                             | n/a                   |
|           |                     | 1M           | 0               | N/A        | N/A        | suboptimal     | n/a               | n/a         | n/a                             | n/a                   |
|           |                     | Baseline     | 0.3             | 1084       | 246        | 20%            | 0                 | 0           | Strong, 100% pc                 | negative              |
| AUTO2-006 | 225x10 <sup>6</sup> | 3M           | 1.3             | 2623       | 0          | 0              | 0                 | n/a         | n/a                             | n/a                   |
|           |                     | Baseline     | 4.6             | 596        | 579        | 80%            | 1%                | 0           | Strong, >50%                    | moderate, 40%         |
|           |                     | 1M           | 21.7            | 235        | 258        | 25%            | 2%                | 1%          | Strong, >50%                    | Weak, 10%             |
| AUTO2-007 | 225x10 <sup>6</sup> | 3M           | 0.3             | 441        | 460        | 70-80%         | 0                 | 0           | Moderate, 30-40%                | Weak, <5%             |
|           |                     | Baseline     | 2.4             | 441        | 267        | 10%            | 1-2%              | 0           | Moderate, >50%                  | Weak, 10%             |
|           |                     | 1M           | 0.02            | 154        | 0          | 0              | 0                 | 0           | n/a                             | n/a                   |
|           |                     | 3M           | 0.3             | 172        | 137        | <1%            | 2%                | 1%          | n/a                             | n/a                   |
|           |                     | 6M           | 0.7             | 87         | 540        | <1%            | 1%                | 0           | n/a                             | n/a                   |
| AUTO2-008 | 225x10 <sup>6</sup> | Baseline     | 26              | 431        | 622        | not available  |                   |             |                                 |                       |
|           |                     | 1M           | 29              | 1409       | 1384       | 30-40%         | 5%                | 1%          | Moderate, 30-40%                | Weak, 50%             |
| AUTO2-009 | 600x10 <sup>6</sup> | Baseline     | 0               | N/A        | N/A        | 0              | <1%               | 0           | n/a                             | n/a                   |
|           |                     | 1M           | 0               | N/A        | N/A        | 0              | <1%               | 0           | n/a                             | n/a                   |
|           |                     | 3M           | 0               | N/A        | N/A        | 0              | 5-10%             | 1%          | n/a                             | n/a                   |
|           |                     | 6M           | 0               | N/A        | N/A        | 0              | 2%                | occasional  | n/a                             | n/a                   |
| AUTO2-010 |                     | Baseline     | 0               | N/A        | N/A        | 0              | 2%                | 0           | n/a                             | n/a                   |
|           |                     | 1M           | 0               | N/A        | N/A        | not available  |                   |             |                                 |                       |
|           |                     | 3M           | 0.1             | -          | 602        |                |                   |             |                                 |                       |
| AUTO2-011 | 600x10 <sup>6</sup> | Baseline     | 7.5/5.4         | 780        | 0          | 60-70%         | 2%                | 0           | Weak, 50%                       | Negative              |
|           |                     | 1M           | 0.2             | 400        | 203        | 80%            | 1-2%              | 0           | Weak, 50%                       | Negative              |
| AUTO2-012 | 900x10 <sup>6</sup> | Baseline     | 11              | 516        | 549        | 90%            | 1%                | 0           | Weak, >50%                      | Negative              |
|           |                     | 1M           | 0.54            | 782        | 486        | 90%            | 10%               | 2%          | Moderate, >50%                  | Negative              |
|           |                     | 3M           | 12.5            | 322        | 309        | 90%            | 5%                | 1%          | Moderate/strong, 50%            | Negative              |

**Supp Table 3.** BCMA and TACI quantification. Months (M), Antigens Bound per Cell (ABC), Bone Marrow Mononuclear Cells (BMMNCs), Plasma Cells (PC)

| Patient ID  | CRS | CRS Grade | Neurotox | Received Tocilizimab | Other toxicity                                                                                                |
|-------------|-----|-----------|----------|----------------------|---------------------------------------------------------------------------------------------------------------|
| 0201GB01001 | Yes | 1         | No       |                      | Anaemia G3<br>Neutropenia G4<br>Thrombocytopenia G4                                                           |
| 0201GB01002 | No  | -         | No       |                      | Anaemia G3<br>Neutropenia G4<br>Bone Pain G3<br>Arthralgia G3<br>Pneumonia G3<br>Sinusitis G3<br>Vomitting G3 |
| 0201GB01003 | Yes | 1         | No       | yes                  | Neutropenia G4<br>metapneumovirus G3<br>Breast Ca-G5                                                          |
| 0201GB01005 | No  | -         | No       |                      | Anaemia G3<br>Neutropenia G4<br>Enterovirus G3<br>Pneumonia G3<br>Rhinovirus G3<br>Headache G3                |
| 0201GB01006 | No  | -         | No       |                      | Neutropenia G4<br>Bone pain G3                                                                                |
| 0201GB05007 | No  | -         | No       |                      | Anaemia G3<br>Neutropenia G4<br>Pseudomonas bacteraemia G3                                                    |
| 0201GB05008 | No  | -         | No       |                      | Anaemia G3<br>Neutropenia G4                                                                                  |
| 0201GB01009 | Yes | 1         | No       | Yes                  | Anaemia G3<br>Neutropenia G4<br>hypocalcaemia G3<br>hypophosphataemia G3                                      |
| 0201NL01010 | Yes | 1         | No       |                      | Anaemia G3<br>Neutropenia G4<br>Thrombocytopenia G4                                                           |
| 0201GB01011 | No  | -         | No       |                      | Neutropenia G4<br>enterococcus faecalis UTI G3                                                                |
| 0201GB01012 | Yes | 1         | No       | Yes                  | Anaemia G3<br>Neutropenia G4<br>Myocardial infarction G3                                                      |

**Supp Table 4.** Grade 3 or higher toxicity observed in AUTO2

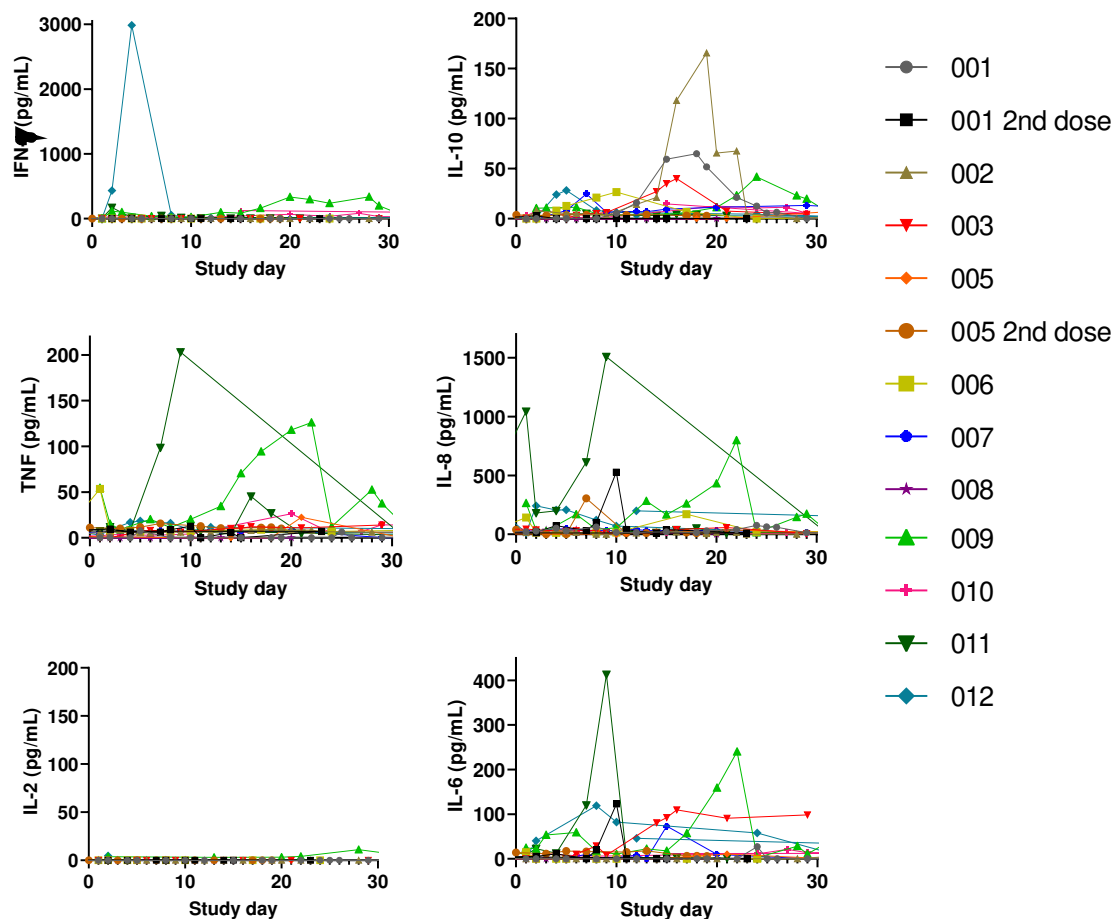

**Supp Figure 1** Serum cytokines levels in the first month post CAR T-cell infusion.

A

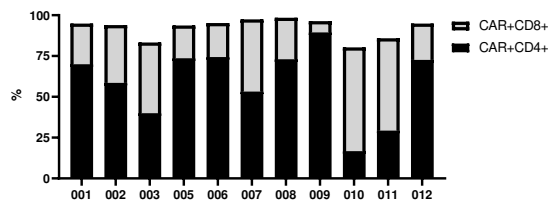

B

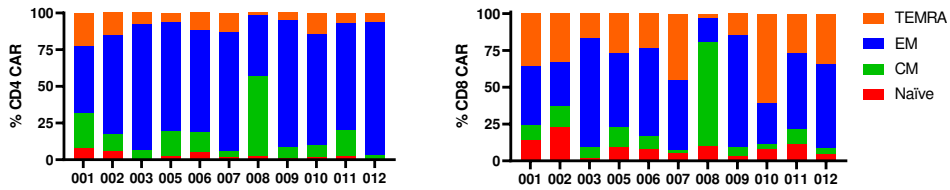

**Supp Figure 2.** (A) CD4:CD8 ratio and (B) Memory subsets of manufactured APRIL CAR product. Terminally differentiated effector memory cells re-expressing CD45RA (TEMRA), effector memory(EM), central memory(CM).

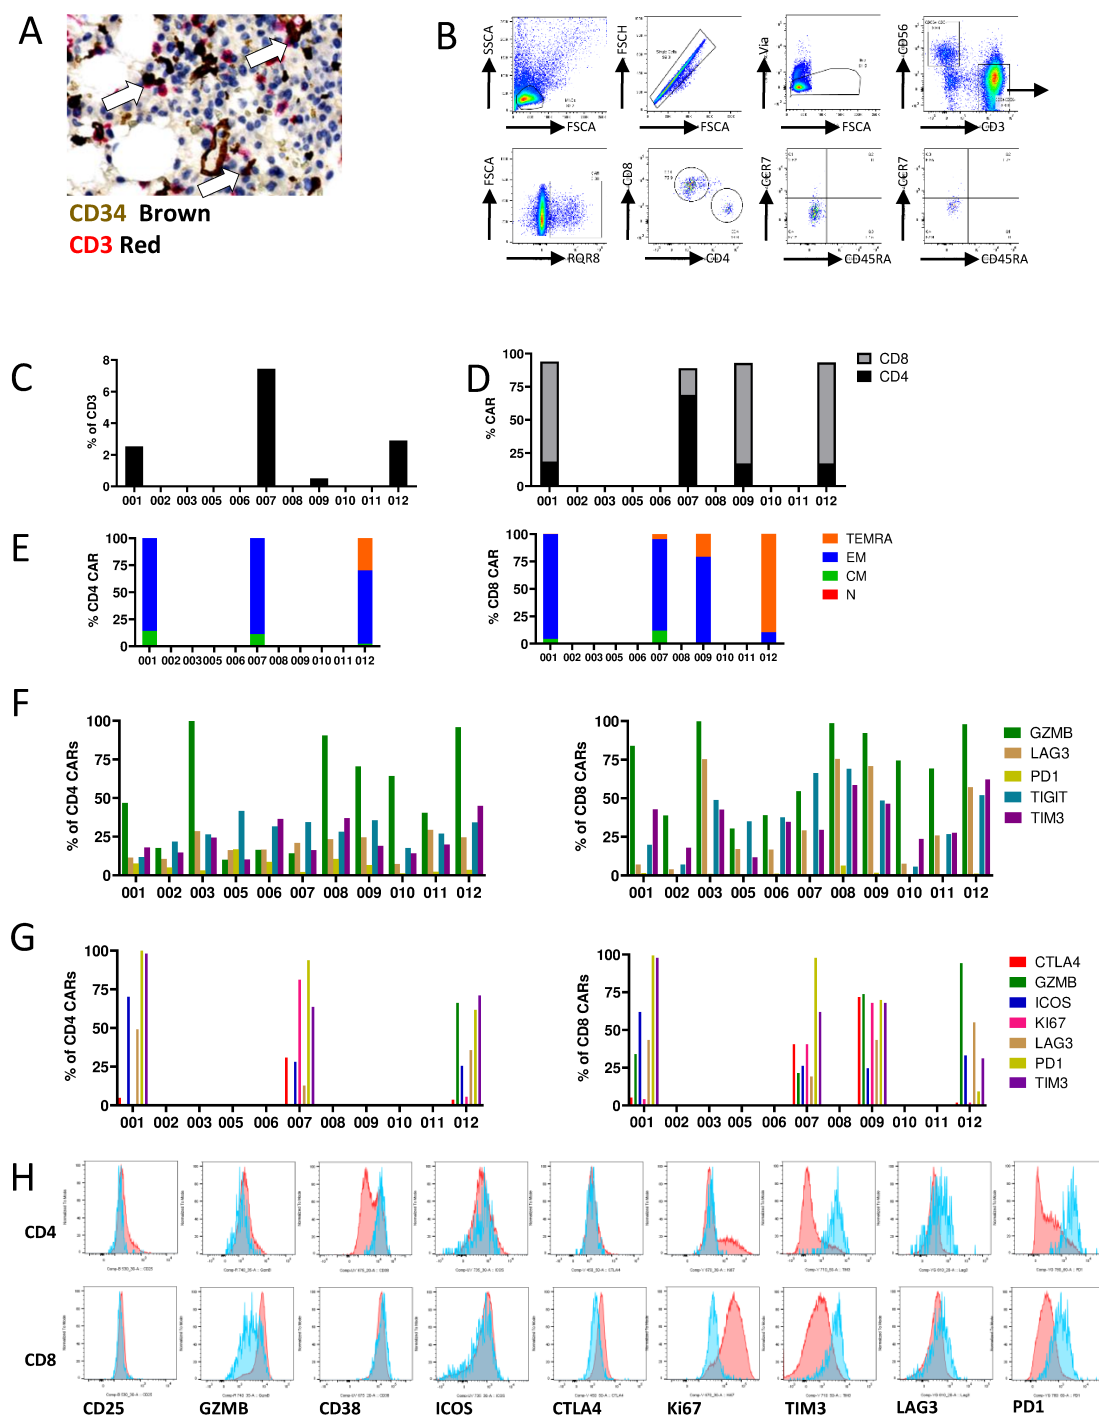

**Supp Figure 3.** (A) CAR T cells (arrowed) in the tumour niche were also observed by multiplex immunohistochemistry. (B) An example gating strategy for patient 001 shown. Results displayed if there were >50 CD4 or CD8 CAR T cells analysed. CAR T cells also expressed RQR8 marker containing the CD34 epitope recognised by QBend10 antibodies. BM aspirate from treated patients were analysed by FACS 1 month post infusion for (C) presence of CAR T cells (D) CD4:CD8 ratio and in samples with a minimum of 50 CAR T cells, memory phenotype (E) was analysed. CAR expression of immunomodulatory proteins on APRIL CAR T cell product (F) and at month 1 post infusion from bone marrow aspirate (G). (H) Comparison of expression of activation, proliferation or immune modulation markers on APRIL CAR T cells (blue) and non CAR T cells (red) from the BM of patient 001 1 month post infusion of first dose.

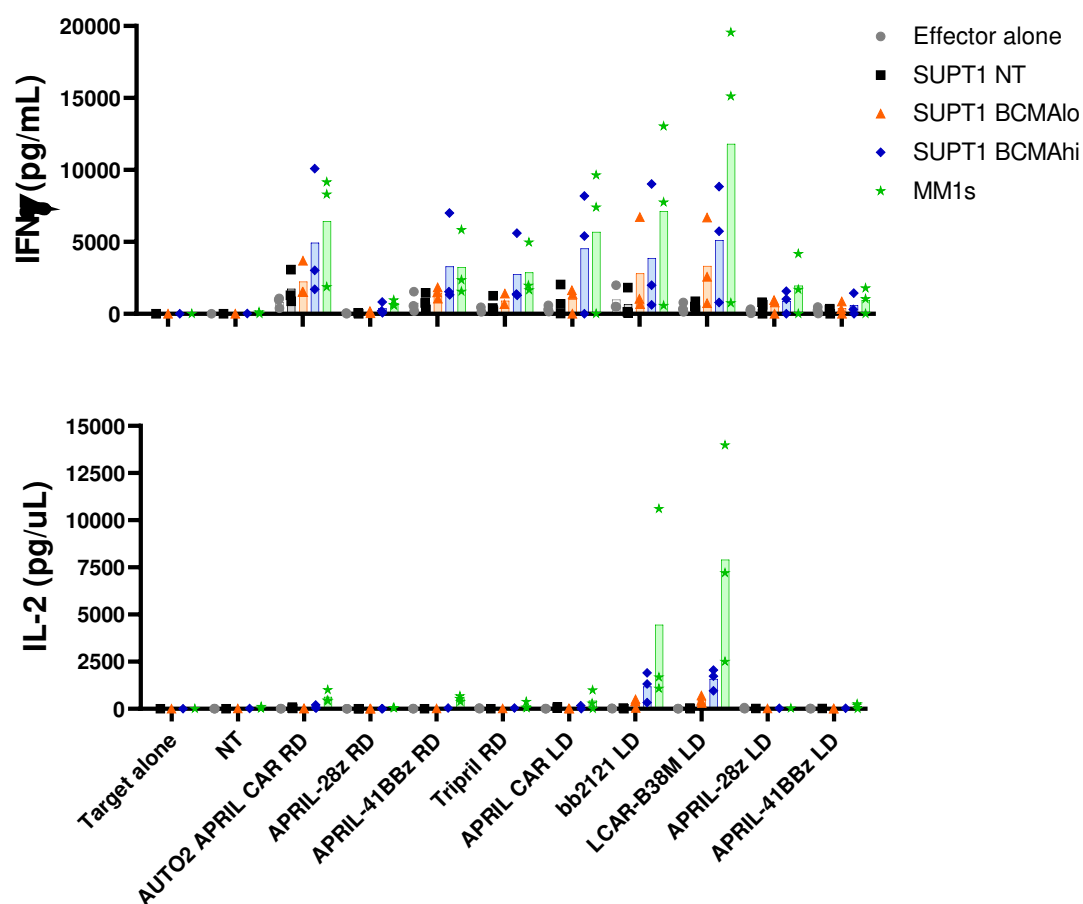

**Supp Figure 4. Cytokine release by APRIL CAR variants, bb2121 and LCAR-B38M CAR in vitro.** CAR transduced PBMNCs from normal donors (n=3) were cocultured with non transduced SUPT1 targets (SUPT1 NT) or targets engineered to express low levels of BCMA (SUPT1 BCMAlo, 636 molecules per cell), high levels of BCMA (SUPT1 BCMAhi,  $2 \times 10^5$  molecules per cell) and MM1.s cells at an effector to target ratio (E:T) of 1:4. IFN $\gamma$  and IL2 release as assessed by ELISA of culture supernatant at 24 hours. \*\*\*=p<0.001. RD=retrovirus and LD= lentivirus



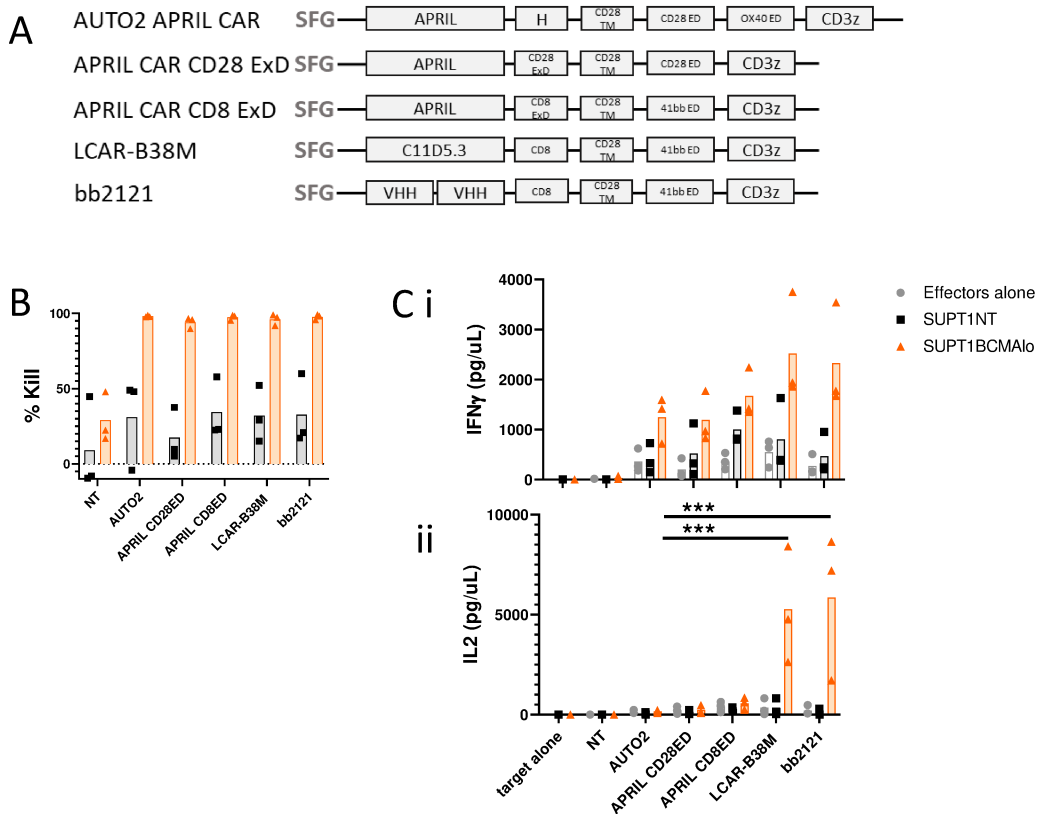

**Supp Figure 5. Target kill and cytokine release by APRIL CAR with varying exodomains in vitro.** (A) Diagram summarising various CAR constructs assessed functionally. CAR transduced PBMNCS from normal donors ( $n=3$ ) were cocultured with non transduced SUPT1 targets (SUPT1 NT) or targets engineered to express low levels of BCMA (SUPT1 BCMA<sub>lo</sub>, 636 molecules per cell), at an effector to target ratio (E:T) of 1:4. (B) Target kill as a percentage of targets in media alone (C) IFN $\gamma$  and IL2 release as assessed by ELISA of culture supernatant at 24 hours. \*\*\*=  $p<0.001$  by paired T test.

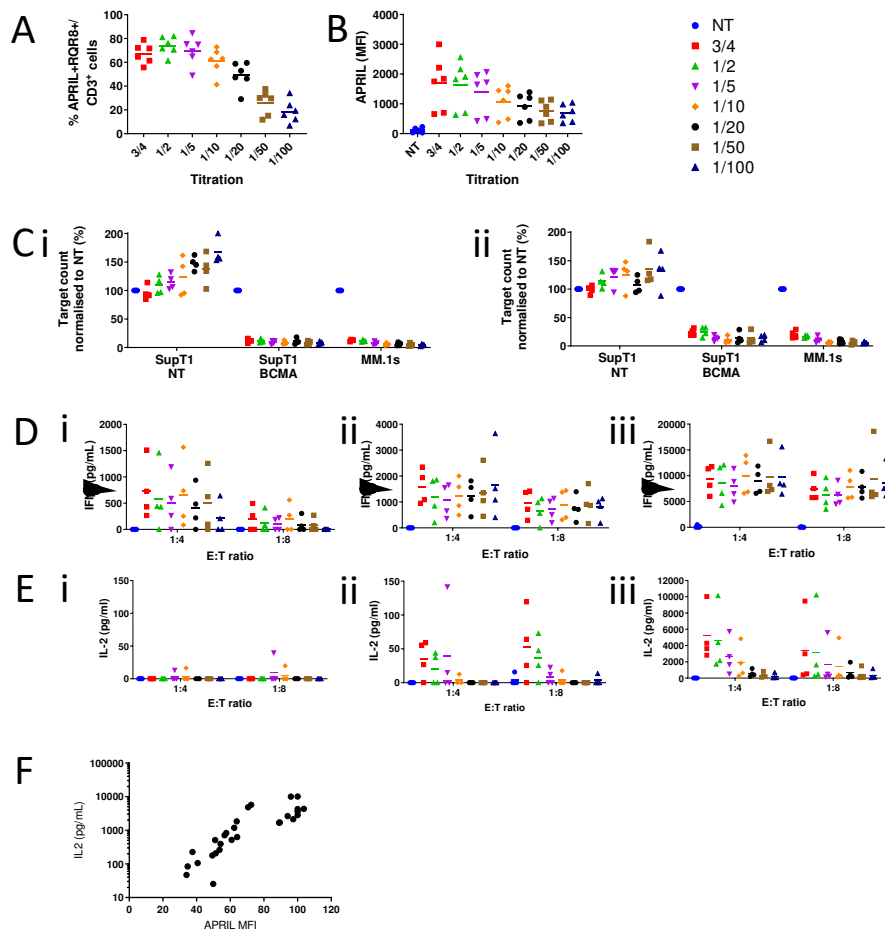

**Supp Figure 6. Effect of transduction efficiency on APRIL CAR function.** PBMCs from normal donors ( $n=4$ ) were transduced with diluted viral supernatant which reduced transduction efficiency of transduced T cells (A) and reduced the expression of APRIL on the cell surface (B). Target kill at 24 hour by non transduced (NT) or APRIL CAR transduced T cells of unmanipulated SUPT1 cells or SUPT1 engineered to express low levels of BCMA (SUPT1 BCMA) or MM1s cells at 1:4 (Ci) or 1:8(Cii). IFN $\gamma$  release at 24 hours cocultured at an E:T ratio of 1:4 with SUPT1NT(Di) SUPT1BCMA (Dii) or MM1s (Diii). IL2 secretion by T cells transduced with reducing titrations of viral supernatant on coculture (E:T ratio of 1:4) with SUPT1 NT (Ei), SUPT1 BCMA(Eii) and MM1s cells(Eiii). (F) APRIL MFI of APRIL CAR transduced PBMCs normalised to NT T cells, correlated to IL2 release at 1:4 coculture with MM1s cells at 24 hours ( $r=0.9055$ ,  $p<0.0001$  by Spearmans correlation).

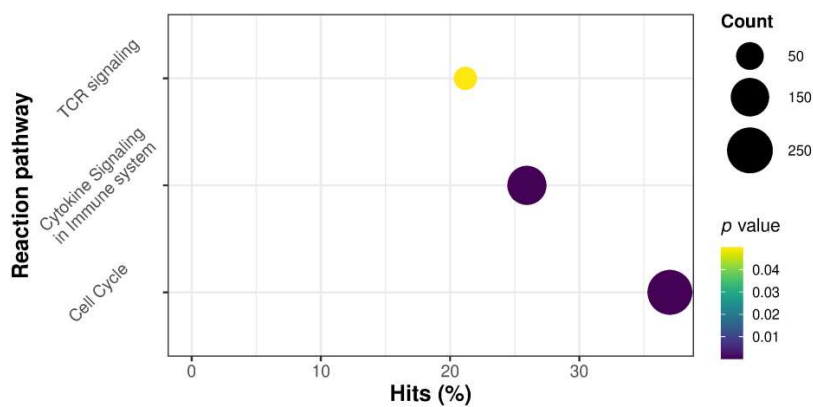

**Supp Figure 7. GO Seq enrichment analysis of Reactome pathways using bulk RNA seq of non transduced PBMCS compared to those transduced with all CARs (APRIL CAR, bb2121 and LCAR-B38M) showed reduced expression of genes contained in TCR signalling (R-HSA-202424), cytokine signalling(R-HSA-1280215) and cell cycle(R-HSA-1640170). The dot plot shows the number (count) and proportion (hits) of differentially expressed genes in each pathway**

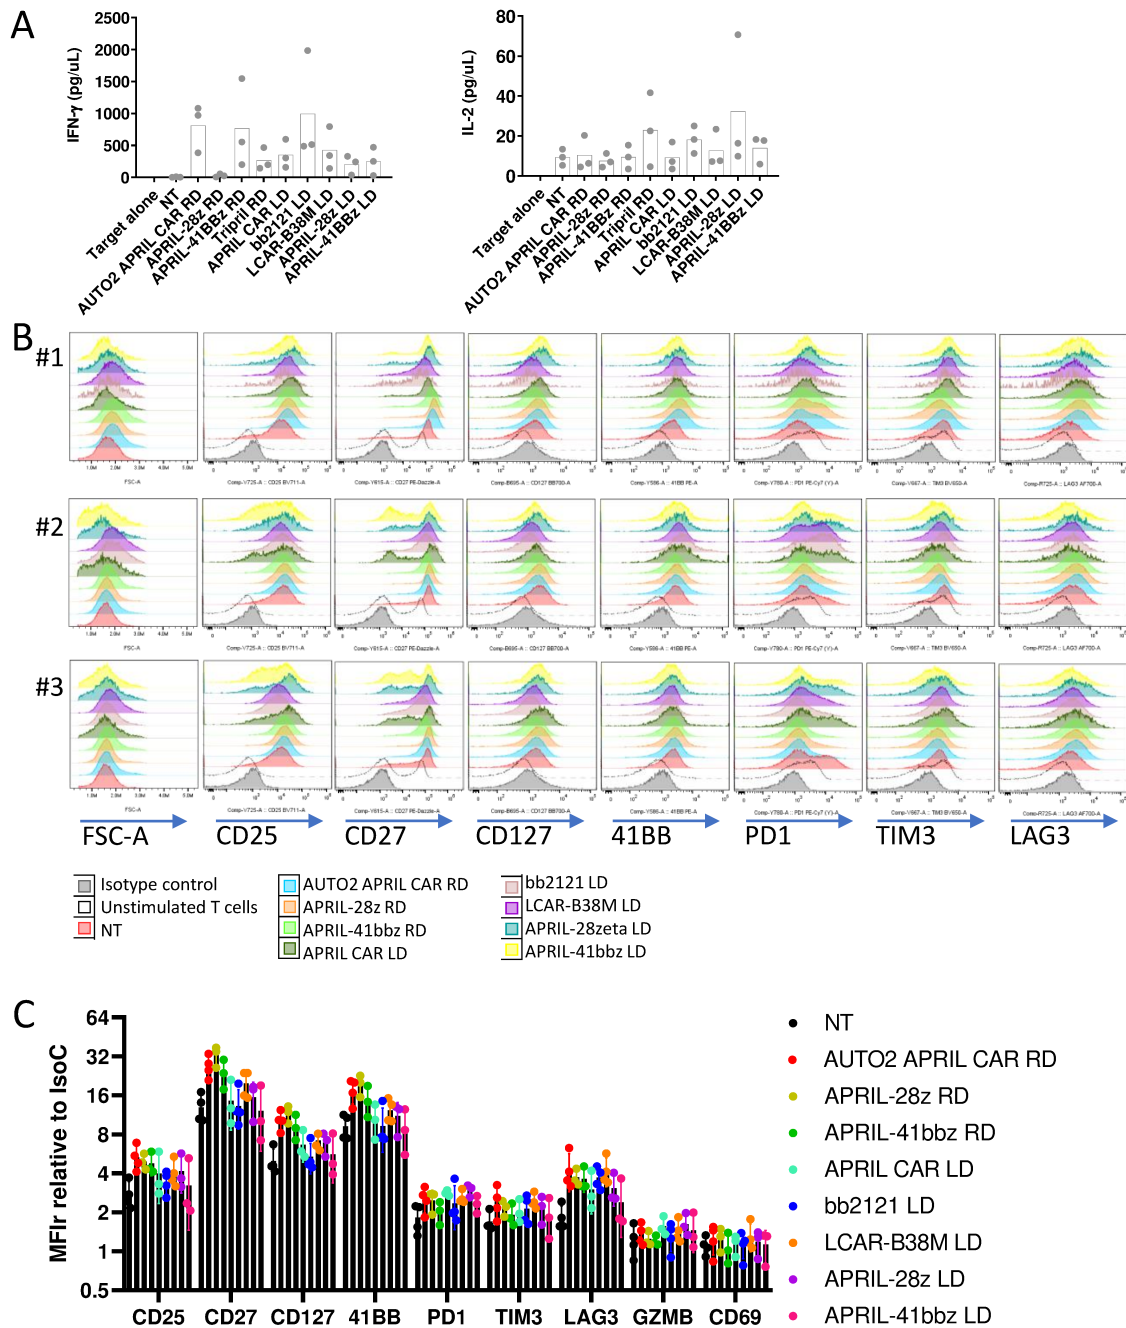

**Supp Figure 8 Assessment of autoactivation of APRIL CAR variants, bb2121 and LCAR-B38M depicted in Figure 3a.** (A) Cytokine release from PBMCs transduced with CAR constructs (retrovirus/RD transduced APRIL CAR variants or LD/lentivirus transduced bb2121, LCAR-B38M or APRIL variants) and then cocultured alone. IFN $\gamma$  and IL2 from supernatant was quantified by ELISA. (B) Cells were then phenotyped by FACS at baseline (outlined in black) and after 7 days following initial activation and transduction with CAR constructs (C) Graph showing MFI of labelled proteins relative to isotype control. There was no significant difference in protein expression of the 3<sup>rd</sup> generation, RD transduced CAR used in the AUTO2 trial (labelled RD APRIL) and bb2121, LCAR-B38M or other variants of APRIL CAR construct (by multiple paired T tests and two stage step up method for multiple comparisons)

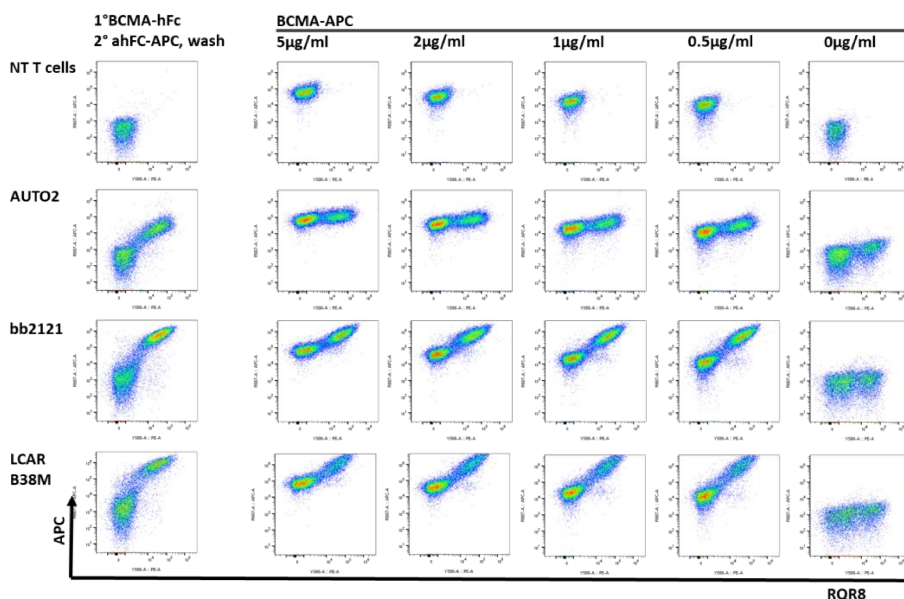

**Supp Figure 9. Soluble BCMA binding by T cells expressing AUTO2, bb2121 and LCAR-B38M CARs** was assessed by transducing PBMCs from three healthy donors with bicistronic constructs coexpressing RQR8 marker gene (in format RQR8\_2A\_CAR) before incubation with different concentration with APC conjugated BCMA. FACS plots shown of CAR transduced PBMCs stained with BCMA-Fc followed by secondary staining with anti hFc-APC and a wash step or APC conjugated BCMA (without wash step).

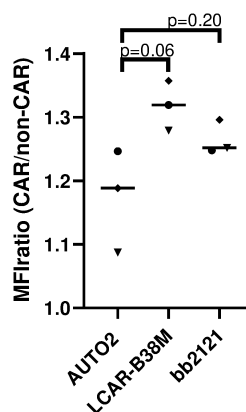

**Supp Figure 10. Phosphoflow of activated CARs.** T cells expressing AUTO2, bb2121 and LCAR-B38M CARs were incubated with H929 cells for 5 mins before fixation and FACS staining for phosphorylated ZAP70 (tyr319). Individual donors indicated by different symbols and MFI ratio of CARs vs non CAR T cells shown. Comparison of AUTO2 to other constructs made by paired T tests.
